# Supplementary material for: Metaviromes reveal the dynamics of Pseudomonas host-specific phages cultured and uncultured by plaque assay
Source: bioRxiv or medRxiv preprint supplement (doi:10.1101/2021.04.27.441580), 2021-04-27

Figure S7

Figure S7: Accumulative abundance of all contigs in the three virome types.

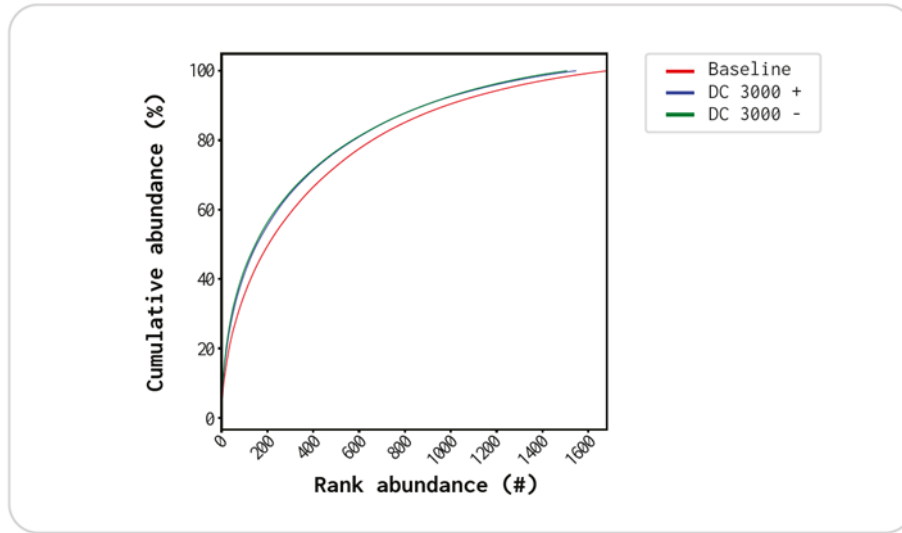

Supplement: Supplementary file [file media-3.pdf]
