# Supplementary material for: Metaviromes reveal the dynamics of Pseudomonas host-specific phages cultured and uncultured by plaque assay
Source: bioRxiv or medRxiv preprint supplement (doi:10.1101/2021.04.27.441580), 2021-04-27
Supplement: Supplementary file [file media-5.pdf]

**Table S3**

**Table S3:** Virsorter2 results on contigs. Data of total contigs, as well as how much was identified putative viral and putative non-viral by VirSorter2.

| <b>Assembly</b>                             | <b>No. of putative viral contigs</b> | <b>No. of putative non-viral contigs</b> | <b>Total no. of contigs</b> | <b>% putative viral contigs</b> | <b>% putative non-viral contigs</b> |
|---------------------------------------------|--------------------------------------|------------------------------------------|-----------------------------|---------------------------------|-------------------------------------|
| Baseline metaSPAdes (Assembly 1)            | 11,867                               | 3,915                                    | 15,782                      | 75.2                            | 24.8                                |
| DC3000 + metaSPAdes (Assembly 2)            | 9,481                                | 2,690                                    | 12,171                      | 77.9                            | 22.1                                |
| DC3000 + A metaSPAdes (Assembly 3)          | 3,738                                | 883                                      | 4,621                       | 80.9                            | 19.1                                |
| DC3000 + B metaSPAdes (Assembly 4)          | 4,155                                | 1,091                                    | 5,246                       | 79.2                            | 20.8                                |
| DC3000 + C metaSPAdes (Assembly 5)          | 2,818                                | 686                                      | 3,504                       | 80.4                            | 19.6                                |
| DC3000 – metaSPAdes (Assembly 6)            | 16,925                               | 5,332                                    | 22,257                      | 76.0                            | 24.0                                |
| DC3000 – A metaSPAdes (Assembly 7)          | 6,796                                | 1,904                                    | 8,700                       | 78.1                            | 21.9                                |
| DC3000 – B metaSPAdes (Assembly 8)          | 6,389                                | 1,860                                    | 8,249                       | 77.5                            | 22.5                                |
| DC3000 – C metaSPAdes (Assembly 9)          | 6,647                                | 1,865                                    | 8,512                       | 78.1                            | 21.9                                |
| All samples Hybrid metaSPAdes (Assembly 10) | 30,068                               | 9,666                                    | 39,734                      | 75.7                            | 24.3                                |
| Baseline Canu (Assembly 11)                 | 2,184                                | 113                                      | 2,297                       | 95.1                            | 4.9                                 |
| Baseline Canu (Assembly 12)                 | 2,184                                | 113                                      | 2,297                       | 95.1                            | 4.9                                 |
