# Supplementary material for: Metaviromes reveal the dynamics of Pseudomonas host-specific phages cultured and uncultured by plaque assay
Source: bioRxiv or medRxiv preprint supplement (doi:10.1101/2021.04.27.441580), 2021-04-27
Supplement: Supplementary file [file media-6.pdf]

**Table S4****Table S4:** Virsorter2 results on bp. Data of total bp, as well as how much was identified putative viral and putative non-viral by

VirSorter2

| <b>Assembly</b>                                      | <b>No. of putative viral bp</b> | <b>No. of putative non-viral bp</b> | <b>Total no. of bp</b> | <b>% putative Viral bp</b> | <b>% putative non-viral bp</b> |
|------------------------------------------------------|---------------------------------|-------------------------------------|------------------------|----------------------------|--------------------------------|
| Baseline<br>metaSPAdes<br>(Assembly 1)               | 29,835,217                      | 5,643,379                           | 35,478,596             | 84.1                       | 15.9                           |
| DC3000 +<br>metaSPAdes<br>(Assembly 2)               | 21,504,440                      | 3,661,585                           | 25,166,025             | 85.5                       | 14.5                           |
| DC3000 + A<br>metaSPAdes<br>(Assembly 3)             | 9,004,304                       | 1,196,940                           | 10,201,244             | 88.3                       | 11.7                           |
| DC3000 + B<br>metaSPAdes<br>(Assembly 4)             | 9,500,589                       | 1,466,266                           | 10,966,855             | 86.6                       | 13.4                           |
| DC3000 + C<br>metaSPAdes<br>(Assembly 5)             | 6,364,929                       | 926,243                             | 7,291,172              | 87.3                       | 12.7                           |
| DC3000 –<br>metaSPAdes<br>(Assembly 6)               | 39,008,458                      | 7,481,007                           | 46,489,465             | 83.9                       | 16.1                           |
| DC3000 – A<br>metaSPAdes<br>(Assembly 7)             | 15,563,712                      | 2,596,593                           | 18,160,305             | 85.7                       | 14.3                           |
| DC3000 – B<br>metaSPAdes<br>(Assembly 8)             | 14,712,604                      | 2,586,311                           | 17,298,915             | 85.0                       | 15.0                           |
| DC3000 – C<br>metaSPAdes<br>(Assembly 9)             | 15,557,533                      | 2,593,590                           | 18,151,123             | 85.7                       | 14.3                           |
| All samples<br>hybrid<br>metaSPAdes<br>(Assembly 10) | 86,640,254                      | 14,128,443                          | 100,768,697            | 86.0                       | 14.0                           |
| Baseline<br>Canu<br>(Assembly 11)                    | 27,445,358                      | 314,256                             | 27,759,614             | 98.9                       | 1.1                            |
| Baseline<br>Canu<br>(Assembly 12)                    | 27,436,635                      | 313,952                             | 27,750,587             | 98.9                       | 1.1                            |
