# Supplementary material for: Metaviromes reveal the dynamics of Pseudomonas host-specific phages cultured and uncultured by plaque assay
Source: bioRxiv or medRxiv preprint supplement (doi:10.1101/2021.04.27.441580), 2021-04-27
Supplement: Supplementary file [file media-7.pdf]

**Table S5**

**Table S5:** CheckV result on individual assemblies. Distribution of contig quality identification by CheckV in regards to phage genome completeness for each of the 11 assemblies

| <b>Assembly</b>                                      | <b>Complete/high</b> | <b>Medium</b> | <b>Low</b> | <b>Not determined</b> | <b>Total vOTUs</b> |
|------------------------------------------------------|----------------------|---------------|------------|-----------------------|--------------------|
| Baseline<br>metaSPAdes<br>(Assembly 1)               | 29                   | 51            | 12,274     | 2,434                 | 14,788             |
| DC3000 +<br>metaSPAdes<br>(Assembly 2)               | 17                   | 31            | 9,865      | 1,532                 | 11,445             |
| DC3000 + A<br>metaSPAdes<br>(Assembly 3)             | 6                    | 19            | 3,805      | 492                   | 4,916              |
| DC3000 + B<br>metaSPAdes<br>(Assembly 4)             | 7                    | 20            | 4,346      | 582                   | 4,955              |
| DC3000 + C<br>metaSPAdes<br>(Assembly 5)             | 5                    | 11            | 2,941      | 385                   | 3,342              |
| DC3000 –<br>metaSPAdes<br>(Assembly 6)               | 26                   | 52            | 17,504     | 3,204                 | 20,786             |
| DC3000 – A<br>metaSPAdes<br>(Assembly 7)             | 15                   | 19            | 7,060      | 1,048                 | 8,142              |
| DC3000 – B<br>metaSPAdes<br>(Assembly 8)             | 9                    | 28            | 6,808      | 899                   | 7,744              |
| DC3000 – C<br>metaSPAdes<br>(Assembly 9)             | 12                   | 23            | 6,912      | 1,044                 | 7,991              |
| All samples<br>Hybrid<br>metaSPAdes<br>(Assembly 10) | 132                  | 196           | 29,751     | 6,401                 | 36,480             |
| Baseline<br>Canu<br>(Assembly 11)                    | 116                  | 171           | 1,595      | 122                   | 2,004              |
