# Supplementary material for: Metaviromes reveal the dynamics of Pseudomonas host-specific phages cultured and uncultured by plaque assay
Source: bioRxiv or medRxiv preprint supplement (doi:10.1101/2021.04.27.441580), 2021-04-27
Supplement: Supplementary file [file media-8.pdf]

**Table S8**

**Table S8:** Observed vOTUs in each of the virome samples used for Figure 4 in the main text.

| <b>Sample</b> | <b>Observed vOTUs</b> |
|---------------|-----------------------|
| Baseline      | 1387                  |
| DC3000 + A    | 1547                  |
| DC3000 + B    | 1450                  |
| DC3000 + C    | 1316                  |
| DC3000 – A    | 1508                  |
| DC3000 – B    | 1500                  |
| DC3000 – C    | 1417                  |
