# Supplementary material for: Metaviromes reveal the dynamics of Pseudomonas host-specific phages cultured and uncultured by plaque assay
Source: bioRxiv or medRxiv preprint supplement (doi:10.1101/2021.04.27.441580), 2021-04-27
Supplement: Supplementary file [file media-9.pdf]

**Table S9**

**Table S9:** Read mapping coverage of plaque-forming phages from organic waste sample. Total reads of each sample were mapped to the genomes. Depth coverage (black): trimmed mean pileup coverage. Breadth coverage (red) Percentage of the contig positions covered by mapped reads. Gray: genomes with breadth coverage >=80%.

| Phage         | Viral population | Baseline depth | Baseline breadth | All depth | All breadth |
|---------------|------------------|----------------|------------------|-----------|-------------|
| DrKristoffer  | NODE_5           | 0.103          | 51.28%           | 3.929     | 98.86%      |
| GhoastToast   | GhoastToast      | 0.023          | 25.49%           | 0.018     | 34.55%      |
| Hovsa         | NODE_16          | 0.015          | 21.77%           | 0.295     | 60.04%      |
| OtownIsak     | NODE_16          | 0.065          | 50.70%           | 4.393     | 99.99%      |
| SummerBoyErik | SummerBoyErik    | 0.037          | 32.17%           | 0.024     | 42.61%      |

| Phage         | Viral population | DC3000 + A depth | DC3000 + A breadth | DC3000 + B depth | DC3000 + B breadth | DC3000 + C depth | DC3000 + C breadth | DC3000 + depth | DC3000 + breadth |
|---------------|------------------|------------------|--------------------|------------------|--------------------|------------------|--------------------|----------------|------------------|
| DrKristoffer  | NODE_5           | 52.287           | 94.52%             | 0.310            | 55.23%             | 0.538            | 59.72%             | 16.562         | 98.25%           |
| GhoastToast   | GhoastToast      | 0.000            | 4.77%              | 0.000            | 0.84%              | 0.000            | 1.89%              | 0.000          | 6.67%            |
| Hovsa         | NODE_16          | 0.529            | 37.02%             | 1.141            | 43.88%             | 0.972            | 42.21%             | 0.937          | 49.57%           |
| OtownIsak     | NODE_16          | 14.643           | 99.14%             | 18.284           | 99.12%             | 11.018           | 99.06%             | 15.151         | 99.99%           |
| SummerBoyErik | SummerBoyErik    | 0.000            | 2.21%              | 0.000            | 2.80%              | 0.000            | 1.24%              | 0.000          | 5.30%            |

| Phage         | Viral population | DC3000 - A depth | DC3000 - A breadth | DC3000 - B depth | DC3000 - B breadth | DC3000 - C depth | DC3000 - C breadth | DC3000 - depth | DC3000 - breadth |
|---------------|------------------|------------------|--------------------|------------------|--------------------|------------------|--------------------|----------------|------------------|
| DrKristoffer  | NODE_5           | 0.083            | 35.36%             | 0.053            | 26.80%             | 0.062            | 31.47%             | 0.081          | 54.39%           |
| GhoastToast   | GhoastToast      | 0.000            | 6.69%              | 0.013            | 15.06%             | 0.010            | 14.36%             | 0.014          | 23.90%           |
| Hovsa         | NODE_16          | 0.157            | 36.16%             | 0.154            | 38.32%             | 0.029            | 20.41%             | 0.126          | 47.26%           |
| OtownIsak     | NODE_16          | 3.014            | 98.78%             | 1.837            | 97.30%             | 0.494            | 86.67%             | 1.793          | 99.04%           |
| SummerBoyErik | SummerBoyErik    | 0.000            | 8.82%              | 0.014            | 15.46%             | 0.012            | 15.62%             | 0.018          | 28.42%           |
