# Supplementary material for: Metaviromes reveal the dynamics of Pseudomonas host-specific phages cultured and uncultured by plaque assay
Source: bioRxiv or medRxiv preprint supplement (doi:10.1101/2021.04.27.441580), 2021-04-27
Supplement: Supplementary file [file media-10.pdf]

**Table S10**

**Table S10:** CRISPR hits on host taxonomy at species level. Out of the 3,515 viral populations, 1164 had hits to a bacterial CRISPR spacer from the Shmakov database. A total of 806 of those hits could be assigned to a host at the species level. Below are the genera with  $\geq 5$  assigned viral populations.

| <b>Genus</b>         | <b>Count</b> | <b>Genus</b>           | <b>Count</b> |
|----------------------|--------------|------------------------|--------------|
| <i>Lactobacillus</i> | 209          | <i>Bifidobacterium</i> | 10           |
| <i>Pseudomonas</i>   | 47           | <i>Bacillus</i>        | 9            |
| <i>Xanthomonas</i>   | 18           | <i>Salmonella</i>      | 7            |
| <i>Dickeya</i>       | 18           | <i>Aeromonas</i>       | 7            |
| <i>Acinetobacter</i> | 17           | <i>Klebsiella</i>      | 7            |
| <i>Pediococcus</i>   | 14           | <i>Delftia</i>         | 6            |
| <i>Streptococcus</i> | 13           | <i>Yersinia</i>        | 6            |
| <i>Escherichia</i>   | 12           | <i>Pluralibacter</i>   | 5            |
| <i>Serratia</i>      | 11           | <i>Porphyromonas</i>   | 5            |
| <i>Acetobacter</i>   | 11           | <i>Bacteroides</i>     | 5            |
