# Supplementary material for: Metaviromes reveal the dynamics of Pseudomonas host-specific phages cultured and uncultured by plaque assay
Source: bioRxiv or medRxiv preprint supplement (doi:10.1101/2021.04.27.441580), 2021-04-27
Supplement: Supplementary file [file media-11.pdf]

**Table S11**

**Table S11:** Putative phage contigs that has a Log2FC above 1 (Green dots) or below – 1 (Red dots) (Figure 5A). Contigs were blasted using megablast. Denoted below are the top viral hit with lowest E-value and highest query coverage.

| Contig      | Size (Bp) | > 1: Log2FC > 1<br>< -1: Log2FC < -1 | Blast hit (Accession no.)                                                | Query Coverage | Per. Identity | E-Value |
|-------------|-----------|--------------------------------------|--------------------------------------------------------------------------|----------------|---------------|---------|
| tig00010143 | 20829     | > 1                                  | Lactobacillus phage iLp1308 (KR905070.1)                                 | 7%             | 77.16%        | 0.0     |
| NODE_45     | 50899     | > 1                                  | Siphoviridae NHS-Seq1 (MH029512.1)                                       | 32%            | 80%           | 0.0     |
| tig00000588 | 18290     | > 1                                  | Lactobacillus phage 3-SAC12 (MK504442.1)                                 | 3%             | 91.75%        | 2e-161  |
| NODE_3      | 59207     | > 1                                  | Enterobacteria phage CAjan (KP064094.1)                                  | 100%           | 100%          | 0.0     |
| NODE_45     | 10380     | > 1                                  | Lactococcus phage 56301 (NC_049405.1)                                    | 45%            | 85.77%        | 0.0     |
| NODE_220    | 5166      | > 1                                  | Lactobacillus phage AQ113 (HE956704.1)                                   | 8%             | 84.40%        | 3e-119  |
| NODE_2743   | 5420      | > 1                                  | Leuconostoc phage CHB (KX578043.1)                                       | 8%             | 67.40%        | 3e-29   |
| tig00001464 | 9726      | < -1                                 | Lactobacillus phage Lenus (NC_047897.1)                                  | 89%            | 97.35%        | 0.0     |
| NODE_830    | 5136      | < -1                                 | Paramecium bursaria Chlerella virus CVM-1 (JX997163.1)                   | 1%             | 75.29%        | 0.003   |
| NODE_690    | 6178      | < -1                                 | Lactobacillus phage 3-521 (NC_048753.1)                                  | 100%           | 97.28%        | 0.0     |
| NODE_2693   | 5480      | < -1                                 | Lactobacillus phage 3-521 (NC_048753.1)                                  | 93%            | 97.70%        | 0.0     |
| NODE_132    | 40054     | < -1                                 | Uncultured Caudivirales phage (LR796317.1)                               | 1%             | 68.32%        | 1e-37   |
| tig00000648 | 32820     | < -1                                 | Lactobacillus phage LR2 (MH837543.1)                                     | 5%             | 67.97%        | 3e-64   |
| tig00000040 | 44196     | < -1                                 | Escherichia phage C130_2 (NC_048067.1)                                   | 2%             | 76.66%        | 4e-127  |
| NODE_852    | 11518     | < -1                                 | Phage apr34_1789 (MK415401.1)                                            | 0%             | 80.21%        | 2e-11   |
| tig00000828 | 11199     | < -1                                 | Proteus phage vB_PmiP_RS8pmA (MG575419.1)                                | 88%            | 93.04%        | 0.0     |
| NODE_830    | 5580      | < -1                                 | <i>Lactococcus lactis</i> . Subs. <i>Lactis</i> strain G423 (CP024958.1) | 1%             | 80%           | 0.047   |
| NODE_214    | 32484     | < -1                                 | Proteus phage PM75 (NC_027363.1)                                         | 61%            | 92.01%        | 0.0     |
