# Supplementary material for: Metaviromes reveal the dynamics of Pseudomonas host-specific phages cultured and uncultured by plaque assay
Source: bioRxiv or medRxiv preprint supplement (doi:10.1101/2021.04.27.441580), 2021-04-27
Supplement: Supplementary file [file media-12.pdf]

**Table S12**

**Table S12:** Putative phage contigs that has a Log2FC between -1 and 1 without a significant abundance (Figure 5A). Contigs were blasted using megablast. Denoted below are the top viral hit with lowest E-value and highest query coverage.

| Contig      | Size (Bp) | 0-1: Log2FC<br>-1-0: Log2FC | Blast hit (accession no.)                      | Query coverage | Per. identity | E-value |
|-------------|-----------|-----------------------------|------------------------------------------------|----------------|---------------|---------|
| NODE_364    | 6226      | 0-1                         | Proteus phage vB_PmiP_RS51pmB (MG575421.1)     | 6%             | 79.59%        | 5e-44   |
| NODE_209    | 8610      | 0-1                         | Bacteriophage sp. Isolate 179 (MN855830.1)     | 54%            | 84.73%        | 0.0     |
| NODE_445    | 5408      | 0-1                         | Lactobacillus phage ATCCB (MK504445.1)         | 21%            | 76.79%        | 1e-174  |
| tig00001258 | 5764      | 0-1                         | Lactobacillus phage AQ113 (HE956704.1)         | 16%            | 72.53%        | 1e-154  |
| NODE_2231   | 6180      | 0-1                         | Myoviridae sp. ctThM1 (MN582070.1)             | 9%             | 72.78%        | 9e-50   |
| NODE_507    | 5015      | 0-1                         | Bacteriophage sp. Isolate 103 (MN855801.1)     | 3%             | 73.96%        | 1e-15   |
| NODE_165    | 6157      | 0-1                         | Bacteriophage sp. Isolate 32 (MN855637.1)      | 0%             | 88.89%        | 4e-05   |
| NODE_281    | 9947      | -1-0                        | Xylella phage Usme (LR743523.1)                | 1%             | 75.94%        | 1e-46   |
| NODE_244    | 10727     | -1-0                        | Salmonella phage assan (MT074440.1)            | 20%            | 69.49%        | 3e-97   |
| tig00000616 | 17334     | -1-0                        | Lactobacillus phage CL2 (KR905067.1)           | 5%             | 83.54%        | 0.0     |
| tig00010057 | 16105     | -1-0                        | Lactobacillus phage LBR48 (GU967410.1)         | 8%             | 92.67%        | 0.0     |
| NODE_966    | 5065      | -1-0                        | Bacteriophage sp. isolate 230 (MN855846.1)     | 41%            | 83.45%        | 0.0     |
| NODE_1644   | 7563      | -1-0                        | Lactobacillus phage ATCC 8014-B2 (NC_047739.1) | 22%            | 80.31%        | 0.0     |
| NODE_2505   | 5716      | -1-0                        | Lactobacillus phage ATCC 8014-B2 (NC_047739.1) | 84%            | 85.48%        | 0.0     |
